# Supplementary material
Source: PubMed Central journal article supplement (PMC8886525)
Supplement: EMBJ-41-e109386-s002.pdf [file EMBJ-41-e109386-s002.pdf]

## Expanded View Figures

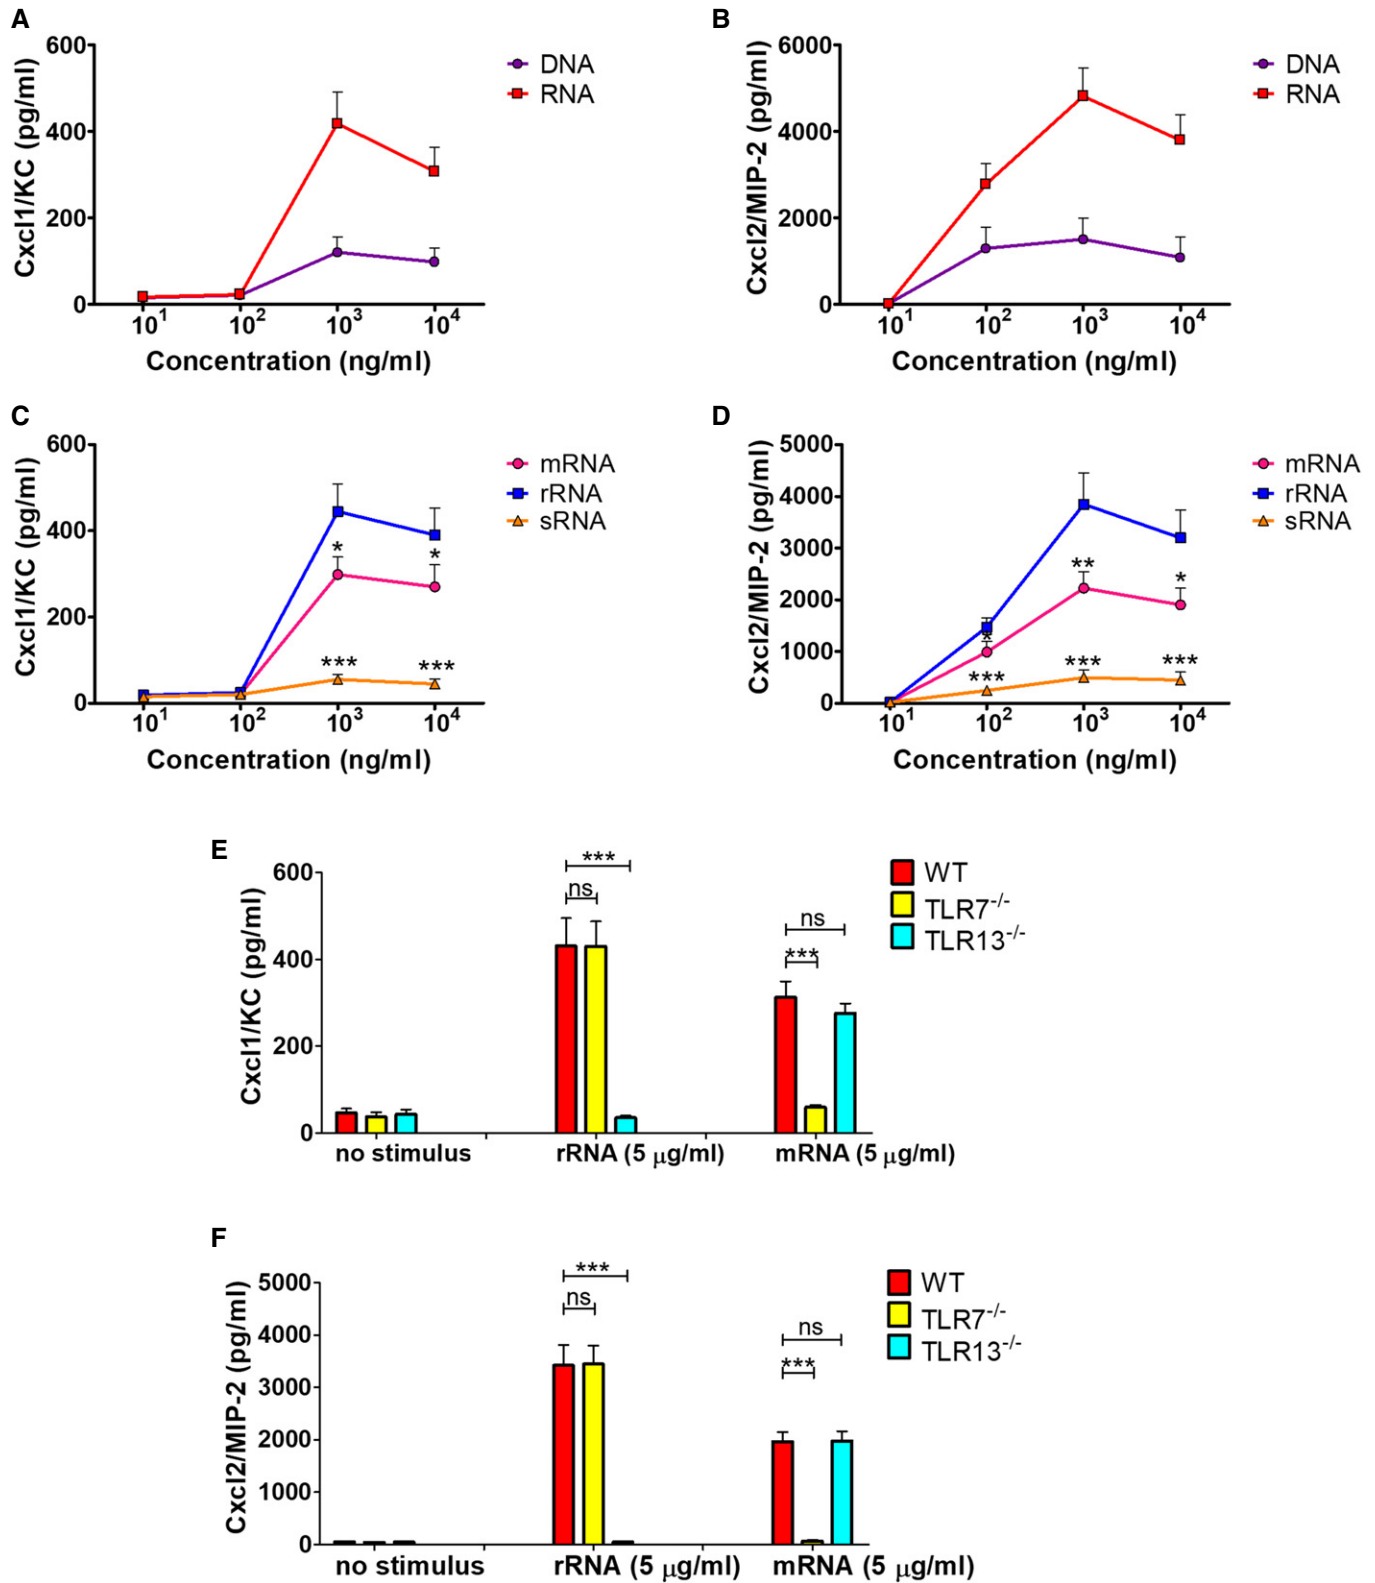

Figure EV1.

**Figure EV1. Production of Cxcl1 and Cxcl2 in neutrophils stimulated with bacterial nucleic acids.**

A–D Concentrations of Cxcl1 (A, and C) and Cxcl2 (B, and D) in supernatants of neutrophil cultures stimulated with increasing concentrations ( $10^1$ ,  $10^2$ ,  $10^3$ , and  $10^4$  ng/ml) of the indicated nucleic acids. mRNA, messenger RNA; rRNA, ribosomal RNA; sRNA small RNA.

E, F Cxcl1 (E) and Cxcl2 (F) concentrations in supernatants of bone marrow-derived neutrophils from mice with genetic deficiency in TLR7 or TLR13 after stimulation with rRNA or mRNA. Chemokine levels in supernatants were measured at 24 h after stimulation.

Data information: Data are expressed as means + SD of three independent experiments conducted in duplicate. \* $P < 0.05$ , \*\* $P < 0.01$ , \*\*\* $P < 0.001$  versus RNA (A and B), rRNA (C and D) or WT mice (E and F), determined by unpaired t-test.

## Neutrophils

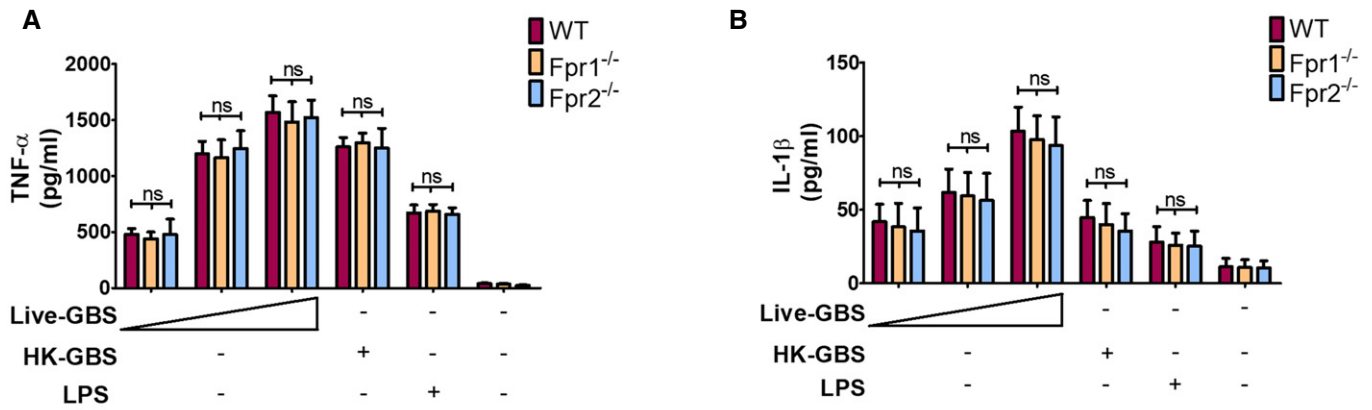

## M-CSF-MΦ

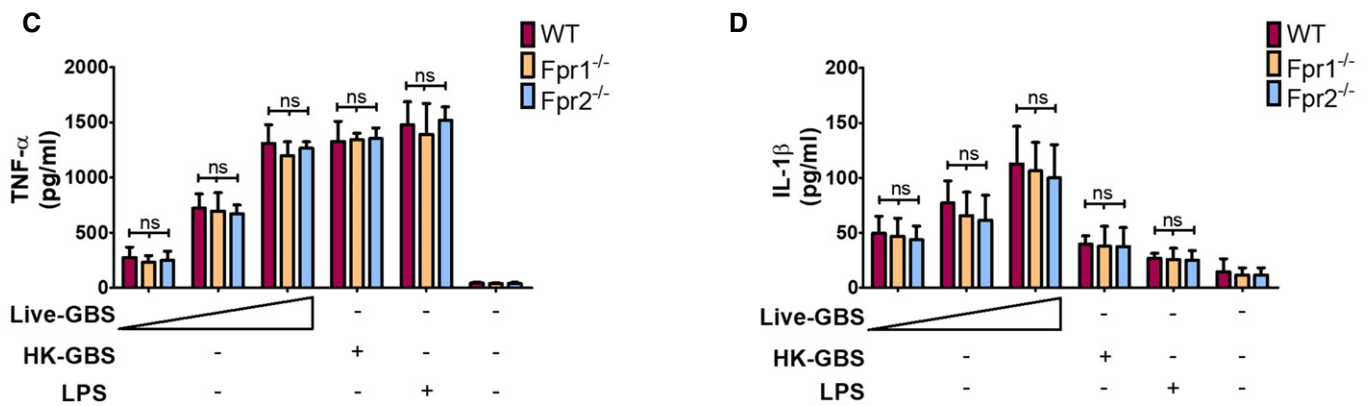

**Figure EV2. Production of pro-inflammatory cytokines in Fpr-defective phagocytes.**

A–D Concentrations of TNF- $\alpha$  (A and C) and IL-1 $\beta$  (B and D) in 24-h culture supernatants of neutrophils (A and B) or M-CSF-polarized BMDMs (C and D) from WT or Fpr-deficient mice stimulated with live GBS (MOI of 2, 5, and 10) or HK-GBS (10  $\mu$ g/ml). LPS (100 ng/ml) was used as a positive control stimulus. Means + SD of data from three independent experiments conducted in duplicate. ns, non-significant, as determined by unpaired t-test.

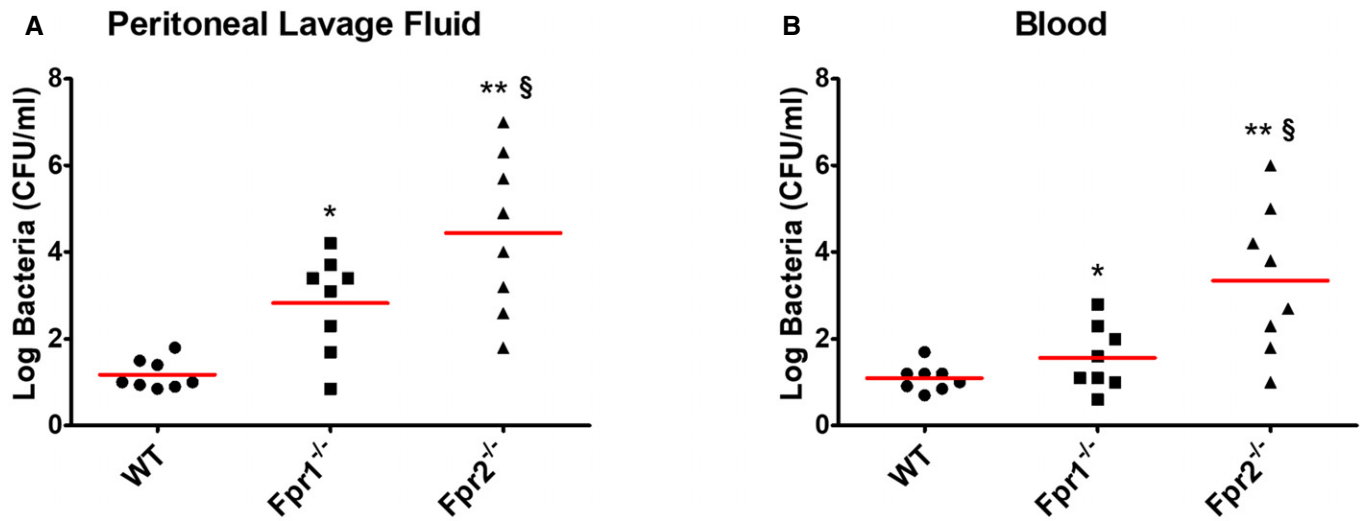

**Figure EV3. Bacterial burden in Fpr-defective mice after challenge with GBS.**

A, B CFU numbers in peritoneal lavage fluid (A) and blood (B) samples from wild type (WT), Fpr1, and Fpr2 KO mice at 24 h after i.p. infection with live GBS ( $2 \times 10^5$  CFU). Horizontal red bars indicate mean values. Each determination was conducted on a different animal in the course of two experiments, each involving 4 animals per group. \* $P < 0.05$ , \*\* $P < 0.01$  vs. WT mice, § $P < 0.05$  vs. Fpr1-deficient mice, as determined by the Wilcoxon test.

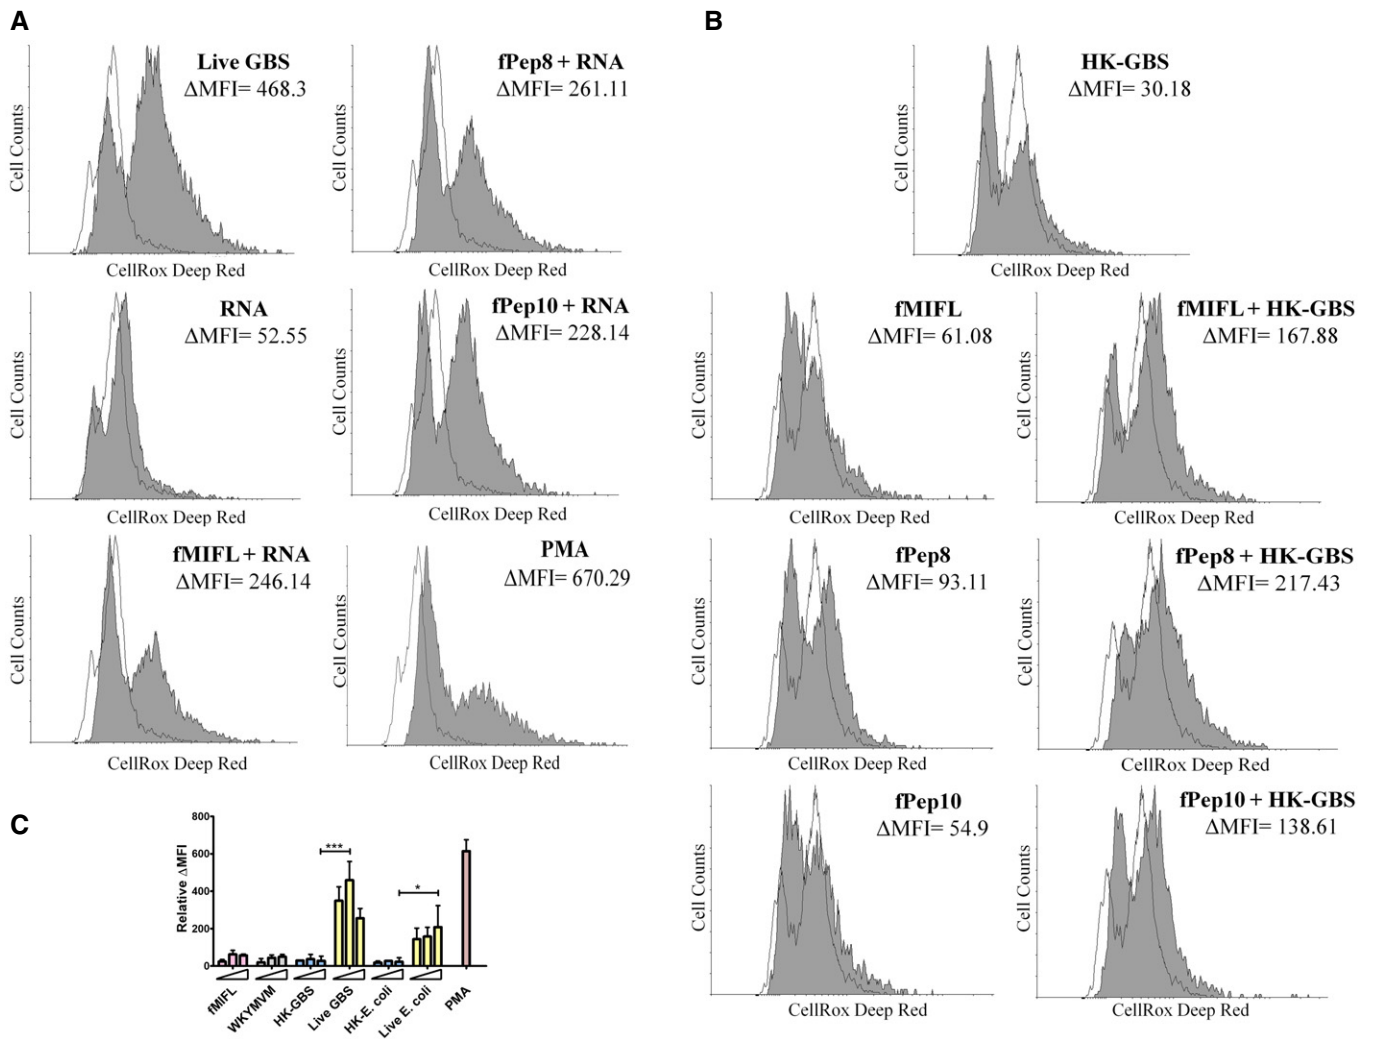

**Figure EV4. ROS production in neutrophils stimulated with Fpr and TLR agonists.**

A, B ROS production in neutrophils stimulated with live GBS (MOI 200) or combinations of Fpr agonists (fMIFL, WKYMVM, or GBS formylated peptides, 50  $\mu\text{M}$ ) and TLR agonists (HK-GBS, 10  $\mu\text{g}/\text{ml}$  or bacterial RNA, 1  $\mu\text{g}/\text{ml}$ ). Phorbol-12-myristate-13-acetate (PMA, 25  $\text{ng}/\text{ml}$ ) was used as a positive control stimulus. Data from one representative experiment of three producing similar results. Cells were stained with the CellROX fluorescent reagent. The shadowed area indicates stimulated cells.

C ROS production in neutrophils stimulated with increasing concentrations of fMIFL or WKYMVM (10, 20, and 50  $\mu\text{M}$ ), HK-bacteria (GBS or *E. coli*, 10, 20, and 40  $\mu\text{g}/\text{ml}$ ) or increasing numbers of live bacteria (MOIs of 100, 200, and 400). PMA (25  $\text{ng}/\text{ml}$ ) was used as a positive control stimulus. Data are expressed as means + SD from three experiments conducted in duplicate. \* $P < 0.05$ , \*\*\* $P < 0.001$ , as determined by unpaired *t*-test.

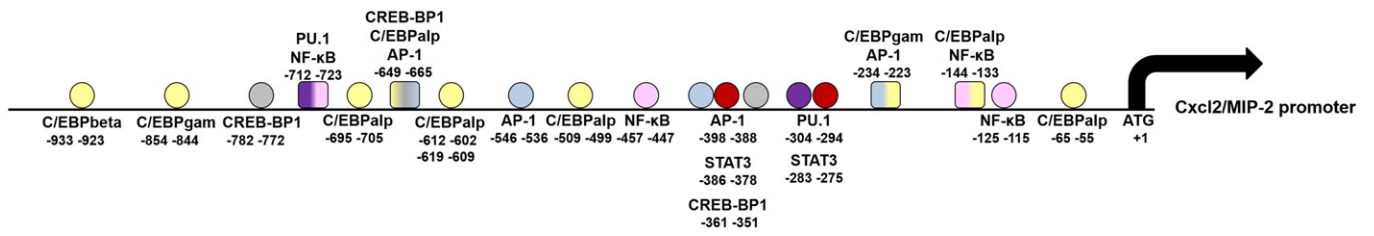

**Figure EV5. Schematic representation of the Cxcl2 promoter.**

The sequence 1,000 nt upstream of the start site was analyzed for the presence of transcription factor-binding sites using the Alibaba2.1 software (Grabe, 2002).
